# Supplementary material for: AFM-based spherical indentation of a brush-coated soft material: modeling the bottom effect
Source: Royal Society of Chemistry journal article supplement (doi:10.1039/d3sm00432e), 2023-01-01
Supplement: d3sm00432e1.pdf [file d3sm00432e1.pdf]

# AFM-based spherical indentation of a brush-coated cell: Modeling the bottom effect

Ivan Argatov<sup>1,2</sup>    Xiaoqing Jin<sup>2\*</sup>    Gennady Mishuris<sup>3</sup>

May 19, 2023

<sup>1</sup>Chongqing University, Chongqing, 400030, China

<sup>2</sup>Technische Universität Berlin, 10623 Berlin, Germany

<sup>3</sup>Aberystwyth University, Ceredigion SY23 3BZ, Wales, UK

## Supplementary Information

### A. Asymptotic constants for a bonded layer

The asymptotic constants  $a_0$  and  $a_1$  can be evaluated as follows (Alexandrov and Pozharskii, 2001):

$$a_m = \frac{(-1)^m}{[(2m)!!]^2} \int_0^\infty [1 - L(u)] u^{2m} du. \quad (\text{A.1})$$

In the case of an isotropic elastic layer bonded to a rigid base, the kernel function is given by

$$L(u) = \frac{2\kappa \sinh(2u) - 4u}{2\kappa \cosh(2u) + 1 + \kappa^2 + 4u^2}, \quad (\text{A.2})$$

where  $\kappa = 3 - 4\nu$  is Kolosov's constant, and  $\nu$  is Poisson's ratio.

The normalized asymptotic constants are defined as

$$\alpha_0 = \frac{8a_0}{3\pi}, \quad \alpha_1 = -\frac{8a_1}{3\pi}.$$

In view of (A.1), we have

$$\alpha_0 = \frac{8}{3\pi} \int_0^\infty [1 - L(u)] du, \quad \alpha_1 = \frac{2}{3\pi} \int_0^\infty [1 - L(u)] u^2 du, \quad (\text{A.3})$$

---

\*Corresponding author

where  $L(u)$  is given by (A.2).

Practically, the improper integrals (A.1) and (A.3) can be evaluated numerically by replacing the infinite upper limit of the integral by a finite upper limit, that is

$$a_m \approx \frac{(-1)^m}{[(2m)!!]^2} \int_0^M [1 - L(u)] u^{2m} du. \quad (\text{A.4})$$

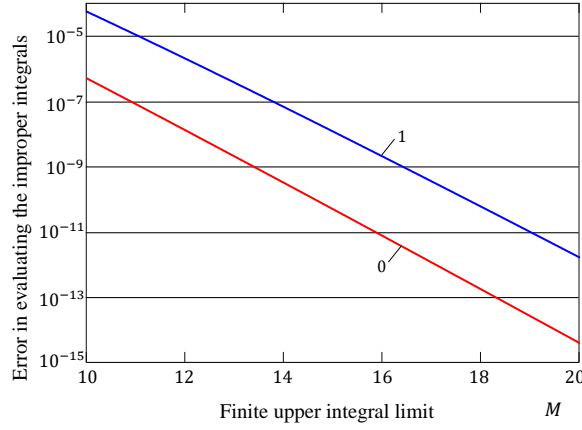

Figure 1: Accuracy of the numerical evaluation of the asymptotic constants  $a_0$  (line 0) and  $a_1$  (line 1), which is the same as that for  $\alpha_0$  and  $\alpha_1$ .

The upper bound for the error of such approximation is illustrated in Fig. 1 for the case  $\nu = 0.5$ . The error is exponentially decaying with the increase of the upper limit  $M$  in the definite integral (A.4).

## B. Accuracy of the approximate solutions

Let us introduce the notation

$$\varepsilon = \frac{a}{H}, \quad \varpi = \frac{\sqrt{R\delta}}{H}, \quad \tilde{F} = \frac{RF}{E^*H^3}, \quad \tilde{\delta} = \frac{R\delta}{H^2}. \quad (\text{B.1})$$

The fourth-order asymptotic solution obtained by Vorovich et al. (1974) has the following form:

$$F = \frac{4}{3} \frac{E^*}{R} a^3 \left( 1 - \varepsilon^3 \frac{8a_1}{3\pi} \right), \quad (\text{B.2})$$

$$F = \frac{4}{3} E^* \delta a \left\{ 1 + \varepsilon \frac{4a_0}{3\pi} + \varepsilon^2 \left( \frac{4a_0}{3\pi} \right)^2 + \varepsilon^3 \left( \frac{4a_0}{3\pi} \right)^3 + \varepsilon^4 \left( \frac{4a_0}{3\pi} \right)^4 + \varepsilon^3 \frac{8a_1}{15\pi} \left( 1 + \varepsilon \frac{8a_0}{3\pi} \right) \right\}. \quad (\text{B.3})$$

Using the asymptotic solution (B.2), (B.3) and the dimensionless variables (B.1), we can represent the approximate force-displacement relation in the *parametric* form as

$$\tilde{F} = \frac{4}{3}\varepsilon^3 \left( 1 - \varepsilon^3 \frac{8a_1}{3\pi} \right), \quad (\text{B.4})$$

$$\tilde{\delta} = \frac{\varepsilon^2 \left( 1 - \varepsilon^3 \frac{8a_1}{3\pi} \right)}{1 + \varepsilon \frac{4a_0}{3\pi} + \varepsilon^2 \left( \frac{4a_0}{3\pi} \right)^2 + \varepsilon^3 \left( \frac{4a_0}{3\pi} \right)^3 + \varepsilon^4 \left( \frac{4a_0}{3\pi} \right)^4 + \varepsilon^3 \frac{8a_1}{15\pi} \left( 1 + \varepsilon \frac{8a_0}{3\pi} \right)}. \quad (\text{B.5})$$

The fourth-order asymptotic solution derived by Argatov and Sabina (2013), which is *asymptotically equivalent* to (B.2), (B.3), has the form

$$\tilde{F} = \frac{4}{3}\varepsilon^3 \left( 1 - \varepsilon^3 \frac{8a_1}{3\pi} \right), \quad (\text{B.6})$$

$$\tilde{\delta} = \varepsilon^2 \left( 1 - \varepsilon \frac{4a_0}{3\pi} - \varepsilon^3 \frac{16a_1}{5\pi} + \varepsilon^4 \frac{32a_0a_1}{9\pi^2} \right). \quad (\text{B.7})$$

The second-order asymptotic solution is recovered from Eqs. (B.6) and (B.7) by dropping the terms containing  $a_1$ , that is as follows (Argatov, 2010):

$$\tilde{F} = \frac{4}{3}\varepsilon^3, \quad \tilde{\delta} = \varepsilon^2 \left( 1 - \varepsilon \frac{4a_0}{3\pi} \right). \quad (\text{B.8})$$

Observe that Eqs. (B.2)–(B.7) utilize only the first two asymptotic constants  $a_0$  and  $a_1$ . The sixth-order asymptotic solution derived by Argatov (2001), which incorporates also the third asymptotic constant  $a_2$ , has the following form:

$$\tilde{F} = \frac{4}{3}\varepsilon^3 \left( 1 - \varepsilon^3 \frac{8a_1}{3\pi} - \varepsilon^5 \frac{128a_2}{15\pi} \right), \quad (\text{B.9})$$

$$\tilde{\delta} = \frac{\varepsilon^2 \left( 1 - \varepsilon^3 \frac{8a_1}{3\pi} - \varepsilon^5 \frac{128a_2}{15\pi} \right)}{\left( 1 - \varepsilon \frac{4a_0}{3\pi} \right)^{-1} + \varepsilon^3 \frac{8a_1}{15\pi} \left( 1 + \varepsilon \frac{8a_0}{3\pi} \right) + \varepsilon^5 \frac{128}{45\pi} \left( \frac{a_0a_1}{\pi} - \frac{a_2}{7} \right)}. \quad (\text{B.10})$$

The fourth-order asymptotic approximation for the force-displacement relation in the *explicit* form, which was obtained by Argatov (2011), has the form

$$\begin{aligned} \tilde{F} = \frac{4}{3}\varpi^3 \left\{ 1 + \varpi \frac{2a_0}{\pi} + \varpi^2 \frac{14a_0^2}{3\pi^2} + \varpi^3 \left( \frac{320a_0^3}{27\pi^3} + \frac{32a_1}{15\pi} \right) \right. \\ \left. + \varpi^4 \left( \frac{286a_0^4}{9\pi^4} + \frac{64a_0a_1}{5\pi^2} \right) \right\} \end{aligned} \quad (\text{B.11})$$

and simplifies to the second-order approximation as follows Argatov (2011):

$$\tilde{F} = \frac{4}{3}\varpi^3 \left( 1 + \varpi \frac{2a_0}{\pi} + \varpi^2 \frac{14a_0^2}{3\pi^2} \right). \quad (\text{B.12})$$

We recall that for a bonded incompressible layer, we have  $a_0 = 1.77022$ ,  $a_1 = -0.95777$ , and  $a_2 = 0.43736$ . In this special case, the following approximate solution was obtained by Dimitriadis et al. (2002):

$$\tilde{F} = \frac{4}{3}\tilde{\delta}^{3/2}\left(1 + 1.133\tilde{\delta}^{1/2} + 1.283\tilde{\delta} + 0.769\tilde{\delta}^{3/2} + 0.0975\tilde{\delta}^2\right). \quad (\text{B.13})$$

A much more accurate solution was derived by Garcia and Garcia (2018) in the form

$$\tilde{F} = \frac{4}{3}\tilde{\delta}^{3/2}\left(1 + 1.133\tilde{\delta}^{1/2} + 1.497\tilde{\delta} + 1.469\tilde{\delta}^{3/2} + 0.755\tilde{\delta}^2\right), \quad (\text{B.14})$$

which differs from (B.13) only by the expansion coefficients.

The accuracy of the analytical solutions outlined above have been tested using the following accurate analytical approximation obtained by Hermanowicz (2021):

$$\tilde{F} = \begin{cases} \frac{4}{3}\tilde{\delta}^{3/2}\left(1 + 1.105\tilde{\delta}^{1/2} + 1.607\tilde{\delta} + 1.602\tilde{\delta}^{3/2}\right), & \tilde{\delta} \leq 0.4 \\ 0.616 - 3.114\tilde{\delta}^{1/2} + 6.693\tilde{\delta} - 7.17\tilde{\delta}^{3/2} + 8.228\tilde{\delta}^2 + \frac{\pi}{2}\tilde{\delta}^3, & 0.4 < \tilde{\delta}. \end{cases} \quad (\text{B.15})$$

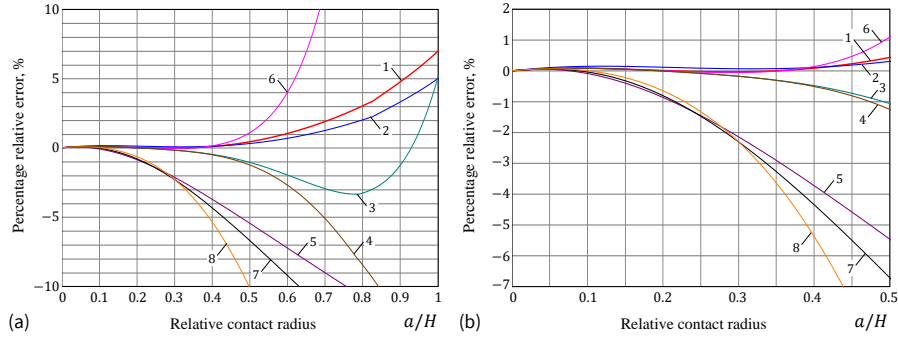

Figure 2: Accuracy of the approximate solutions as a function of the relative contact radius.

The results of the comparison are presented in Figs. 2 and 3, where the following legend applies: Curve 1 corresponds to the fourth-order asymptotic approximation in the explicit form (B.11) (Argatov, 2011); Curve 2 corresponds to the analytical approximation (B.14) (Garcia and Garcia, 2018); Curve 3 corresponds to the fourth-order asymptotic approximation in the parametric form (B.6), (B.6) (Argatov and Sabina, 2013); Curve 4 corresponds to the fourth-order asymptotic approximation in the parametric form (B.2), (B.3) (Vorovich et al., 1974); Curve 5 corresponds to the analytical approximation (B.13) (Dimitriadis et al., 2002); Curve 6 corresponds to the sixth-order asymptotic approximation in the parametric form (B.9), (B.10) (Argatov, 2001); Curve 7

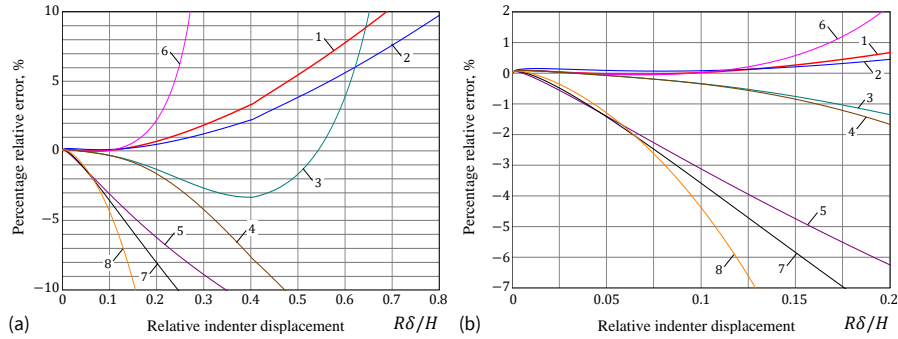

Figure 3: Accuracy of the approximate solutions as a function of the relative indentation depth.

corresponds to the second-order asymptotic approximation in the explicit form (B.12) (Argatov, 2011); Curve 8 corresponds to the second-order asymptotic approximation in the parametric form (B.8) (Argatov, 2010).

### C. Indentation scaling factor

According to the fourth-order asymptotic solution (B.11) obtained by Argatov (2011), the indentation scaling factor can be evaluated as

$$\begin{aligned}
 f(\varpi) = & 1 + \varpi \frac{2a_0}{\pi} + \varpi^2 \frac{14a_0^2}{3\pi^2} + \varpi^3 \left( \frac{320a_0^3}{27\pi^3} + \frac{32a_1}{15\pi} \right) \\
 & + \varpi^4 \left( \frac{286a_0^4}{9\pi^4} + \frac{64a_0a_1}{5\pi^2} \right). \tag{B.16}
 \end{aligned}$$

In view of (A.1) and (A.2), the variation of the scaling factor  $f$  as a function of  $\varpi$  depends on the layer Poisson's ratio  $\nu$ . This is illustrated in Fig. 4.

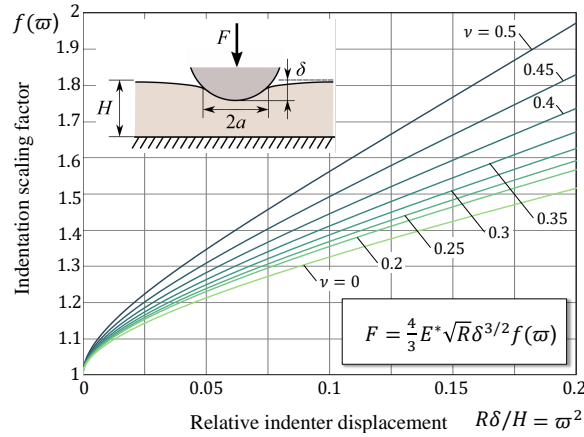

Figure 4: Indentation scaling factor for a paraboloidal indentation of a bonded elastic layer.

## References

- A M Alexandrov and D A Pozharskii. *Three-Dimensional Contact Problems*. Kluwer, Dordrecht, 2001.
- I I Argatov. Frictionless and adhesive nanoindentation: Asymptotic modeling of size effects. *Mechanics of Materials*, 42(8):807–815, 2010.
- I I Argatov. The pressure of a punch in the form of an elliptic paraboloid on an elastic layer of finite thickness. *Journal of Applied Mathematics and Mechanics*, 65(3):495–508, 2001.
- I I Argatov. Depth-sensing indentation of a transversely isotropic elastic layer: second-order asymptotic models for canonical indenters. *International Journal of Solids and Structures*, 48(25-26):3444–3452, 2011.
- I I Argatov and F J Sabina. Asymptotic analysis of the substrate effect for an arbitrary indenter. *Quarterly Journal of Mechanics and Applied Mathematics*, 66(1):75–95, 2013.
- Emilios K Dimitriadis, Ferenc Horkay, Julia Maresca, Bechara Kachar, and Richard S Chadwick. Determination of elastic moduli of thin layers of soft material using the atomic force microscope. *Biophysical Journal*, 82(5):2798–2810, 2002.
- Pablo D Garcia and Ricardo Garcia. Determination of the elastic moduli of a single cell cultured on a rigid support by force microscopy. *Biophysical Journal*, 114(12):2923–2932, 2018.

Paweł Hermanowicz. Determination of Young's modulus of samples of arbitrary thickness from force distance curves: numerical investigations and simple approximate formulae. *International Journal of Mechanical Sciences*, 193: 106138, 2021.

I I Vorovich, V M Aleksandrov, and V A Babeshko. *Nonclassical Mixed Problems of the Theory of Elasticity*. Science, Moscow, 1974.
